# Supplementary material for: Thin Layer Immunoassay: An Economical Approach to Diagnose Helicobacter pylori Infection in Gastroduodenal Ulcer Disease Patients of Pakistan, a Comparative Analysis
Source: MDPI journal article supplement (doi:10.3390/diagnostics13030517), 2023-01-31
Supplement: s1 [file s1]

**Supplementary Table S1: *Helicobacter pylori* antibody titre in patients suffering from gastroduodenal ulcer and gastritis is determined by thin layer immunoassay method**

| S.N<br>o | SAMPL<br>E<br>CODE | C<br>1 | C<br>2 | 1:<br>2 | 1:<br>4 | 1:<br>8 | 1:1<br>6 | 1:3<br>2 | 1:6<br>4 | 1:12<br>8 | 1:25<br>6 | 1:51<br>2 | 1:102<br>4 | 1:204<br>8 | 1:409<br>6 | 1:819<br>2 | 1:1638<br>4 |
|----------|--------------------|--------|--------|---------|---------|---------|----------|----------|----------|-----------|-----------|-----------|------------|------------|------------|------------|-------------|
| 1.       | A1                 | -      | +      | -       | -       | -       | -        | -        | -        | -         | -         | -         | -          | -          | -          | -          | -           |
| 2.       | A2                 | -      | +      | -       | -       | -       | -        | -        | -        | -         | -         | -         | -          | -          | -          | -          | -           |
| 3.       | 2                  | -      | +      | +       | +       | +       | +        | +        | +        | +         | +         | +         | +          | +          | -          | -          | -           |
| 4.       | 3                  | -      | +      | +       | +       | +       | +        | +        | +        | +         | +         | +         | +          | +          | +          | +          | -           |
| 5.       | 5                  | -      | +      | +       | +       | +       | +        | +        | +        | +         | +         | +         | +          | +          | -          | -          | -           |
| 6.       | 6                  | -      | +      | +       | +       | +       | +        | +        | +        | +         | +         | -         | -          | -          | -          | -          | -           |
| 7.       | 7                  | -      | +      | +       | +       | +       | +        | +        | +        | +         | +         | -         | -          | -          | -          | -          | -           |
| 8.       | 11                 | -      | +      | +       | +       | +       | +        | +        | +        | +         | +         | +         | +          | +          | -          | -          | -           |
| 9.       | 12                 | -      | +      | +       | +       | +       | +        | +        | +        | +         | -         | -         | -          | -          | -          | -          | -           |
| 10.      | 13                 | -      | +      | +       | +       | +       | +        | +        | +        | +         | +         | +         | +          | +          | +          | +          | -           |
| 11.      | 14                 | -      | +      | +       | +       | +       | +        | +        | +        | +         | -         | -         | -          | -          | -          | -          | -           |
| 12.      | 15                 | -      | +      | +       | +       | +       | +        | +        | +        | +         | +         | +         | +          | +          | +          | -          | -           |
| 13.      | 16                 | -      | +      | +       | +       | +       | +        | +        | +        | +         | -         | -         | -          | -          | -          | -          | -           |
| 14.      | 17                 | -      | +      | +       | +       | +       | +        | +        | +        | +         | -         | -         | -          | -          | -          | -          | -           |
| 15.      | 18                 | -      | +      | +       | +       | +       | +        | +        | +        | +         | +         | +         | +          | +          | +          | +          | -           |
| 16.      | 19                 | -      | +      | +       | +       | +       | +        | +        | +        | -         | -         | -         | -          | -          | -          | -          | -           |
| 17.      | 21                 | -      | +      | +       | +       | +       | +        | +        | +        | -         | -         | -         | -          | -          | -          | -          | -           |
| 18.      | 22                 | -      | +      | +       | +       | +       | +        | +        | +        | -         | -         | -         | -          | -          | -          | -          | -           |
| 19.      | 23                 | -      | +      | +       | +       | +       | +        | +        | -        | -         | -         | -         | -          | -          | -          | -          | -           |
| 20.      | 24                 | -      | +      | +       | +       | +       | +        | +        | +        | +         | +         | +         | +          | +          | +          | +          | +           |
| 21.      | 25                 | -      | +      | +       | +       | +       | +        | +        | +        | +         | +         | -         | -          | -          | -          | -          | -           |
| 22.      | 26                 | -      | +      | +       | +       | +       | +        | +        | +        | +         | -         | -         | -          | -          | -          | -          | -           |
| 23.      | 27                 | -      | +      | +       | +       | +       | +        | +        | +        | +         | +         | +         | +          | +          | +          | -          | -           |
| 24.      | 28                 | -      | +      | +       | +       | +       | +        | +        | +        | +         | +         | -         | -          | -          | -          | -          | -           |
| 25.      | 29                 | -      | +      | +       | +       | +       | +        | +        | -        | -         | -         | -         | -          | -          | -          | -          | -           |
| 26.      | 34                 | -      | +      | +       | +       | +       | +        | +        | -        | -         | -         | -         | -          | -          | -          | -          | -           |
| 27.      | 35                 | -      | +      | +       | +       | +       | +        | +        | +        | +         | -         | -         | -          | -          | -          | -          | -           |
| 28.      | 36                 | -      | +      | +       | +       | +       | +        | +        | +        | -         | -         | -         | -          | -          | -          | -          | -           |
| 29.      | 37                 | -      | +      | +       | +       | +       | +        | +        | +        | -         | -         | -         | -          | -          | -          | -          | -           |
| 30.      | 38                 | -      | +      | +       | +       | +       | +        | +        | +        | +         | +         | -         | -          | -          | -          | -          | -           |
| 31.      | 39                 | -      | +      | +       | +       | +       | +        | +        | +        | -         | -         | -         | -          | -          | -          | -          | -           |

|     |     |   |   |   |   |   |   |   |   |   |   |   |   |   |   |   |   |
|-----|-----|---|---|---|---|---|---|---|---|---|---|---|---|---|---|---|---|
| 32. | 40  | - | + | + | + | + | + | + | + | + | + | + | + | + | + | - | - |
| 33. | 41  | - | + | + | + | + | + | + | + | + | + | - | - | - | - | - | - |
| 34. | 43  | - | + | + | + | + | + | + | + | + | + | - | - | - | - | - | - |
| 35. | 44  | - | + | + | + | + | + | + | + | + | + | + | + | + | - | - | - |
| 36. | 48  | - | + | + | + | + | + | + | - | - | - | - | - | - | - | - | - |
| 37. | 49  | - | + | + | + | + | + | + | - | - | - | - | - | - | - | - | - |
| 38. | 50  | - | + | + | + | + | + | + | + | + | + | - | - | - | - | - | - |
| 39. | 51  | - | + | + | + | + | + | + | + | - | - | - | - | - | - | - | - |
| 40. | 52  | - | + | + | + | + | + | + | + | + | - | - | - | - | - | - | - |
| 41. | 53  | - | + | + | + | + | + | + | + | - | - | - | - | - | - | - | - |
| 42. | 54  | - | + | + | + | + | + | + | + | + | - | - | - | - | - | - | - |
| 43. | 55  | - | + | + | + | + | + | + | + | + | + | + | + | - | - | - | - |
| 44. | 56  | - | + | + | + | + | + | + | + | + | + | + | + | + | - | - | - |
| 45. | 59  | - | + | + | + | + | + | + | + | - | - | - | - | - | - | - | - |
| 46. | 60  | - | + | + | + | + | + | + | + | - | - | - | - | - | - | - | - |
| 47. | 61  | - | + | + | + | + | + | + | - | - | - | - | - | - | - | - | - |
| 48. | 67  | - | + | + | + | + | + | + | + | + | - | - | - | - | - | - | - |
| 49. | 69  | - | + | + | + | + | + | + | + | + | + | + | + | - | - | - | - |
| 50. | 70  | - | + | + | + | + | + | + | + | + | + | + | + | - | - | - | - |
| 51. | 71  | - | + | + | + | + | + | + | - | - | - | - | - | - | - | - | - |
| 52. | 74  | - | + | + | + | + | + | + | + | + | + | + | + | + | + | + | + |
| 53. | 75  | - | + | + | + | + | + | + | - | - | - | - | - | - | - | - | - |
| 54. | 77  | - | + | + | + | + | + | + | + | + | + | + | + | + | + | - | - |
| 55. | 78  | - | + | + | + | + | + | + | + | + | + | + | + | + | + | + | + |
| 56. | 80  | - | + | + | + | + | + | + | - | - | - | - | - | - | - | - | - |
| 57. | 86  | - | + | + | + | + | + | + | - | - | - | - | - | - | - | - | - |
| 58. | 87  | - | + | + | + | + | + | + | + | - | - | - | - | - | - | - | - |
| 59. | 88  | - | + | + | + | + | + | + | + | + | + | + | + | + | + | + | + |
| 60. | 89  | - | + | + | + | + | + | + | + | + | + | + | + | + | + | + | - |
| 61. | 92  | - | + | + | + | + | + | + | + | + | - | - | - | - | - | - | - |
| 62. | 95  | - | + | + | + | + | + | + | + | + | - | - | - | - | - | - | - |
| 63. | 97  | - | + | + | + | + | + | + | + | + | - | - | - | - | - | - | - |
| 64. | 99  | - | + | + | + | + | + | + | + | - | - | - | - | - | - | - | - |
| 65. | 10s | - | + | + | + | + | + | + | + | - | - | - | - | - | - | - | - |





[illegible]

|      |      |   |   |   |   |   |   |   |   |   |   |   |   |   |   |   |   |
|------|------|---|---|---|---|---|---|---|---|---|---|---|---|---|---|---|---|
| 168. | 92t  | - | + | + | + | + | + | + | + | + | - | - | - | - | - | - | - |
| 169. | 95t  | - | + | + | + | + | + | + | + | + | - | - | - | - | - | - | - |
| 170. | 97t  | - | + | + | + | + | + | + | + | + | - | - | - | - | - | - | - |
| 171. | 99t  | - | + | + | + | + | + | + | + | - | - | - | - | - | - | - | - |
| 172. | 10st | - | + | + | + | + | + | + | + | - | - | - | - | - | - | - | - |
| 173. | 11st | - | + | + | + | + | + | + | + | + | - | - | - | - | - | - | - |
| 174. | 12st | - | + | + | + | + | + | + | + | - | - | - | - | - | - | - | - |
| 175. | 13st | - | + | + | + | + | + | + | + | + | + | + | + | + | + | - | - |
| 176. | 14st | - | + | + | + | + | + | + | - | - | - | - | - | - | - | - | - |
| 177. | 18st | - | + | + | + | + | + | + | + | + | + | + | + | + | + | + | + |
| 178. | 19st | - | + | + | + | + | + | + | - | - | - | - | - | - | - | - | - |
| 179. | 19st | - | + | + | + | + | + | + | + | + | + | + | + | + | + | + | + |
| 180. | 1st  | - | + | + | + | + | + | + | - | - | - | - | - | - | - | - | - |
| 181. | 20st | - | + | + | + | + | + | + | + | - | - | - | - | - | - | - | - |
| 182. | 21st | - | + | + | + | + | + | + | + | - | - | - | - | - | - | - | - |
| 183. | 22st | - | + | + | + | + | + | + | + | - | - | - | - | - | - | - | - |
| 184. | 23st | - | + | + | + | + | + | + | + | + | + | + | + | + | - | - | - |
| 185. | 25st | - | + | + | + | + | + | + | - | - | - | - | - | - | - | - | - |
| 186. | 26st | - | + | + | + | + | + | + | + | + | + | + | + | - | - | - | - |
| 187. | 2st  | - | + | + | + | + | + | + | + | - | - | - | - | - | - | - | - |
| 188. | 31st | - | + | + | + | + | + | + | + | + | + | + | - | - | - | - | - |
| 189. | 34st | - | + | + | + | + | + | + | + | + | - | - | - | - | - | - | - |
| 190. | 39st | - | + | + | + | + | + | + | + | + | - | - | - | - | - | - | - |
| 191. | 3st  | - | + | + | + | + | + | + | + | + | - | - | - | - | - | - | - |
| 192. | 40st | - | + | + | + | + | + | + | + | + | + | + | + | + | + | - | - |
| 193. | 41st | - | + | + | + | + | + | + | + | + | + | + | + | + | - | - | - |
| 194. | 42st | - | + | + | + | + | + | + | + | + | + | + | - | - | - | - | - |
| 195. | 43st | - | + | + | + | + | + | + | + | + | + | - | - | - | - | - | - |
| 196. | 44st | - | + | + | + | + | + | + | + | - | - | - | - | - | - | - | - |
| 197. | 45st | - | + | + | + | + | + | + | + | + | + | + | + | + | + | + | + |
| 198. | 4st  | - | + | + | + | + | + | + | - | - | - | - | - | - | - | - | - |
| 199. | 50st | - | + | + | + | + | + | + | + | + | + | + | + | + | + | + | + |
| 200. | 52st | - | + | + | + | + | + | + | + | + | - | - | - | - | - | - | - |
| 201. | 56st | - | + | + | + | + | + | + | + | + | + | + | + | - | - | - | - |

|      |      |   |   |   |   |   |   |   |   |   |   |   |   |   |   |   |   |
|------|------|---|---|---|---|---|---|---|---|---|---|---|---|---|---|---|---|
| 202. | 57st | - | + | + | + | + | + | + | - | - | - | - | - | - | - | - | - |
| 203. | 59st | - | + | + | + | + | + | + | + | + | - | - | - | - | - | - | - |
| 204. | 60st | - | + | + | + | + | + | + | + | + | - | - | - | - | - | - | - |
| 205. | 65st | - | + | + | + | + | + | + | + | + | + | + | + | + | + | + | + |
| 206. | 67st | - | + | + | + | + | + | + | - | - | - | - | - | - | - | - | - |
| 207. | 68st | - | + | + | + | + | + | + | + | + | - | - | - | - | - | - | - |
| 208. | 6st  | - | + | + | + | + | + | + | + | + | - | - | - | - | - | - | - |
| 209. | 82st | - | + | + | + | + | + | + | - | - | - | - | - | - | - | - | - |
| 210. | 86st | - | + | + | + | + | + | + | + | + | + | + | - | - | - | - | - |
| 211. | 87st | - | + | + | + | + | + | + | + | + | + | + | - | - | - | - | - |
| 212. | 88st | - | + | + | + | + | + | + | - | - | - | - | - | - | - | - | - |
| 213. | 97st | - | + | + | + | + | + | + | + | + | + | + | + | + | + | + | + |
| 214. | 9st  | - | + | + | + | + | + | + | + | + | + | + | + | + | + | + | + |

Keys:

C1 = control I

NEGATIVE CONTROL (serum + PBS)

C2 = control II POSITIVE CONTROL (serum + vaccine)

A1=NORMAL PERSON 1

A2=NORMAL PERSON 2

+ = water droplet formation

- = no water droplet formation

**Supplementary Table S2:** Different type of negative and positive used to develop thin layer immunoassay.

| S. No | Control samples                                    |                                                              |
|-------|----------------------------------------------------|--------------------------------------------------------------|
|       | Negative controls                                  | Positive controls                                            |
| 1.    | <i>H. pylori</i> antigens = 100ul of 0.02025mg/ml  | Human gastric patients serum = 100ul of 0.36mg/ml            |
| 2.    | Phosphate Buffer saline (washing solution) = 100ul |                                                              |
| 3.    | Secondary antibody = 100ul                         | <i>H. pylori</i> immunized rabbit serum = 100ul of 0.36mg/ml |
| 4.    | Control normal rabbit serum = 100ul of 0.24mg/ml   |                                                              |

|    |                                                  |                                                            |
|----|--------------------------------------------------|------------------------------------------------------------|
| 5. | Control normal sheep Serum = 100ul of 0.32mg/ml  | <i>H. pylori</i> immunized mice serum = 100ul of 0.36mg/ml |
| 6. | Human serum of normal person = 100ul of 0.1mg/ml |                                                            |

**Supplementary Table S3:** Anti-*H. pylori* IgM antibody titer values in gastroduodenal ulcer and gastritis patients by IgM commercial kit ELISA ( $k_M$ ELISA)[30].

|                                                 |                   |                                        |                          |
|-------------------------------------------------|-------------------|----------------------------------------|--------------------------|
| Negative controls<br>(Optical Density)          | 0.015             | Positive controls<br>(Optical Density) | 1.405                    |
|                                                 | 0.014             |                                        | 1.157                    |
|                                                 | 0.0106            |                                        | 1.074                    |
| Mean $\pm$ SD                                   | 0.013 $\pm$ 0.002 | Mean $\pm$ SD                          | 1.212 $\pm$ 0.172        |
| Cutoff value = Mean of negative control + 0.250 |                   |                                        | 0.263                    |
| Prevalence of <i>H. pylori</i> by IgM ELISA kit |                   |                                        | 75 % (0.921 $\pm$ 0.633) |

**Supplementary Table S4:** Anti-*H. pylori* IgG antibody titer values in gastroduodenal ulcer and gastritis patients by IgG commercial kit ELISA ( $k_G$ ELISA)[30]

|                                                 |                    |                                        |                          |
|-------------------------------------------------|--------------------|----------------------------------------|--------------------------|
| Negative controls<br>(Optical Density)          | 0.0037             | Positive controls<br>(Optical Density) | 1.006                    |
|                                                 | 0.0032             |                                        | 1.179                    |
|                                                 | 0.0038             |                                        | 1.083                    |
| Mean $\pm$ SD                                   | 0.003 $\pm$ 0.0003 | Mean $\pm$ SD                          | 1.089 $\pm$ 0.0866       |
| Cutoff value = Mean of negative control + 0.250 |                    |                                        | 0.253                    |
| Prevalence of <i>H. pylori</i> by IgG ELISA kit |                    |                                        | 94 % (2.144 $\pm$ 0.997) |
